# Supplementary material for: A simple multi-well stretching device to induce inflammatory responses of vascular endothelial cells
Source: Royal Society of Chemistry journal article supplement (doi:10.1039/c5lc01416f), 2015-12-08
Supplement: c5lc01416f1.pdf [file c5lc01416f1.pdf]

## A simple multi-array stretching device to induce inflammatory responses of vascular endothelial cells

Jiasheng Wang <sup>a</sup>, Beiyuan Fan <sup>a</sup>, Yuanchen Wei <sup>a</sup>, Xingmei Suo <sup>b\*</sup>, Yongsheng Ding <sup>a\*</sup>

Affiliation:

<sup>a</sup> College of Life Sciences, University of Chinese Academy of Sciences, Beijing 100049, China

<sup>b</sup> School of information engineering, Minzu University of China, Beijing, 100081, China

### Section S-1

The calculation of deformation of spherical cap (the diameter of each culture well is 6 mm)

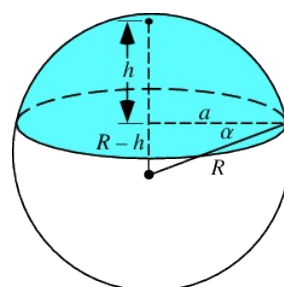

Figure S-1. A spherical cap diagram

A spherical cap is the region of a sphere which lies above (or below) a given plane. Let the sphere have radius  $R$ , then the volume  $V$  of a spherical cap of height  $h$  and base radius  $a$  is given by the equation of a spherical segment,

$$V = \pi h^2 \left( R - \frac{h}{3} \right) \quad (\text{S-1.1})$$

The surface area of the base circle gives

$$S_0 = \pi a^2 \quad (\text{S-1.2})$$

The curved surface area of the spherical cap gives

$$S_i = 2\pi R h \quad (\text{S-1.3})$$

Let  $\varepsilon$  denote the change in surface area on the middle layer between the stretched and unstretched status. The relationship can be described as by

$$S_i = (1 + \varepsilon) S_0 \quad (\text{S-1.4})$$

Combining the formula 2.2, 2.3 and 2.4, the equation gives

$$2Rh = (1 + \varepsilon)a^2 \quad (\text{S-1.5})$$

Using the Pythagorean Theorem gives

$$(R - h)^2 + a^2 = R^2 \quad (\text{S-1.6})$$

Combining the equations 2.5 and 2.6,  $R$  and  $h$  can be solved as

$$R = \frac{a(1 + \varepsilon)}{2\sqrt{\varepsilon}} \quad (\text{S-1.7})$$

$$h = a\sqrt{\varepsilon} \quad (\text{S-1.8})$$

Substituting R and h, the equation (2.1) can be rewritten

$$V = \frac{1}{6}\pi a^3(3+\varepsilon)\sqrt{\varepsilon} \quad (\text{S-1.9})$$

## Section 2

**Table S-1. The Theoretical and Calibrated volume of the formed spherical cap**

| Degree of deformation (%) | Corresponding height of spherical cap (mm) | Theoretical volume ( $\mu\text{L}$ ) | Calibrated volume ( $\mu\text{L}$ ) |
|---------------------------|--------------------------------------------|--------------------------------------|-------------------------------------|
| 5                         | 0.67                                       | 9.6                                  | 18.0                                |
| 10                        | 0.94                                       | 13.8                                 | 22.0                                |
| 15                        | 1.16                                       | 17.2                                 | 26.0                                |
| 20                        | 1.34                                       | 20.2                                 | 30.0                                |

**Table S-2. The sequence of primers**

| Gene   | Sequences of primers                                                                          | Products |
|--------|-----------------------------------------------------------------------------------------------|----------|
| MCP-1  | Forward: 5'cca gca gca agt gtc cca aag 3'<br>Reverse: 5'tgc ttg tcc agg tgg tcc atg 3'        | 115 bp   |
| IL-6   | Forward: 5'gcc act cac ctg ttc aga acg 3'<br>Reverse: 5'ttt cac cag gca agt ctg ctg 3'        | 208 bp   |
| IL-8   | Forward: 5'ttc agg aat tga atg ggt ttg c 3'<br>Reverse: 5'cac tgt gag gta aga tgg tgg c 3'    | 234 bp   |
| ICAM-1 | Forward: 5'ttg gaa gcc tca tcc g 3'<br>Reverse: 5'caa tgt tgc gag acc c 3'                    | 231 bp   |
| eNOS   | Forward: 5'gca acc aca tca agt atg cca cc 3'<br>Reverse: 5'tgt tcc aga ttc gga agt ctg ctg 3' | 102 bp   |
| Rel-A  | Forward: 5'gac gac tgt tcc ccc tc 3'<br>Reverse: 5'cct cgc act tgt agc gg 3'                  | 110 bp   |
| GAPDH  | Forward: 5'tca acg acc act ttg tca agc tca 3'<br>Reverse: 5'gct ggt ggt cca ggg gtc tta ct 3' | 118 bp   |

### Section 3

The round surface of the well bottom was formed after injection of water into chamber.

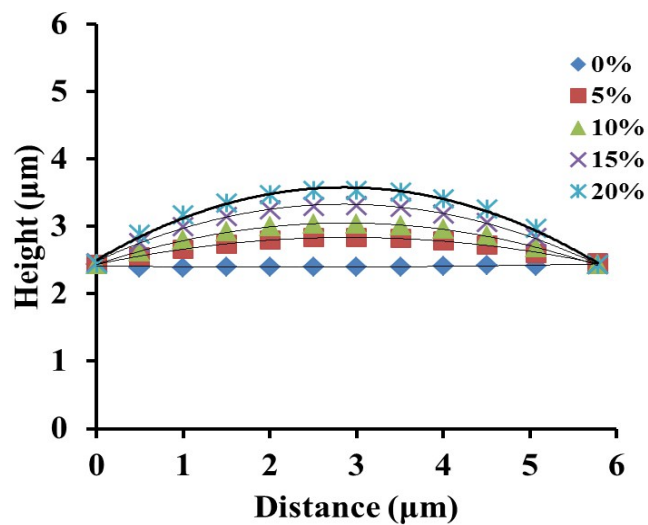

**Figure S-2.** The round shape of well bottom was verified by plotting the height of the focus plate of the points distributed on a longitude line under the different degrees of the deformation.

**Cell viability of peripheral region and intermediate region after 6 h and 12 h stretch**

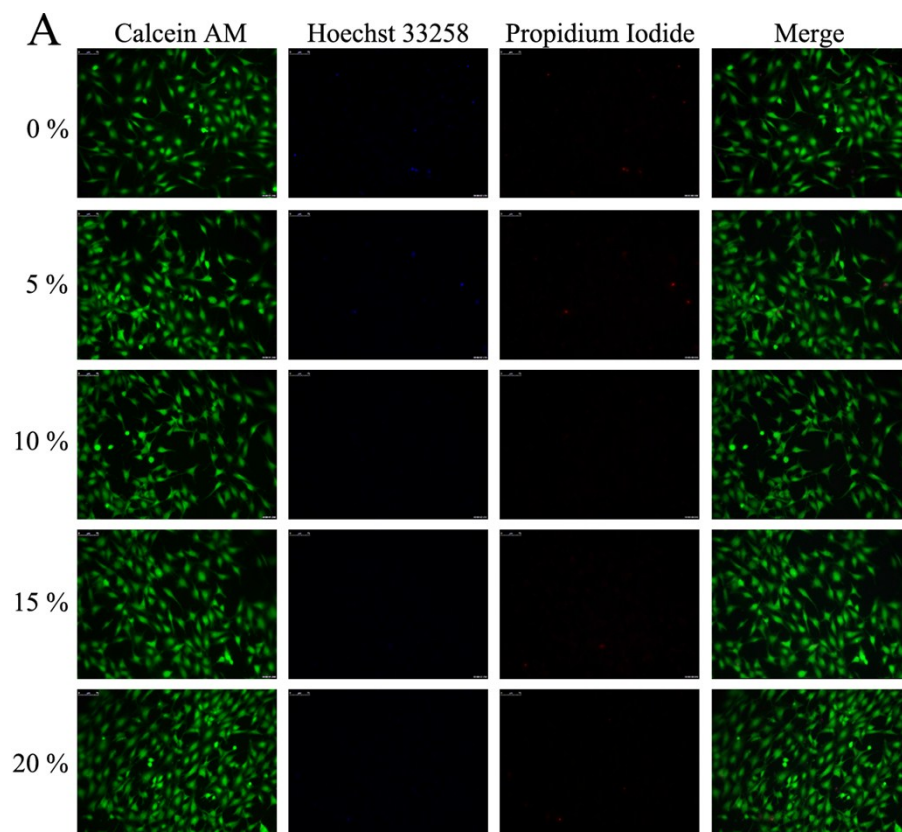

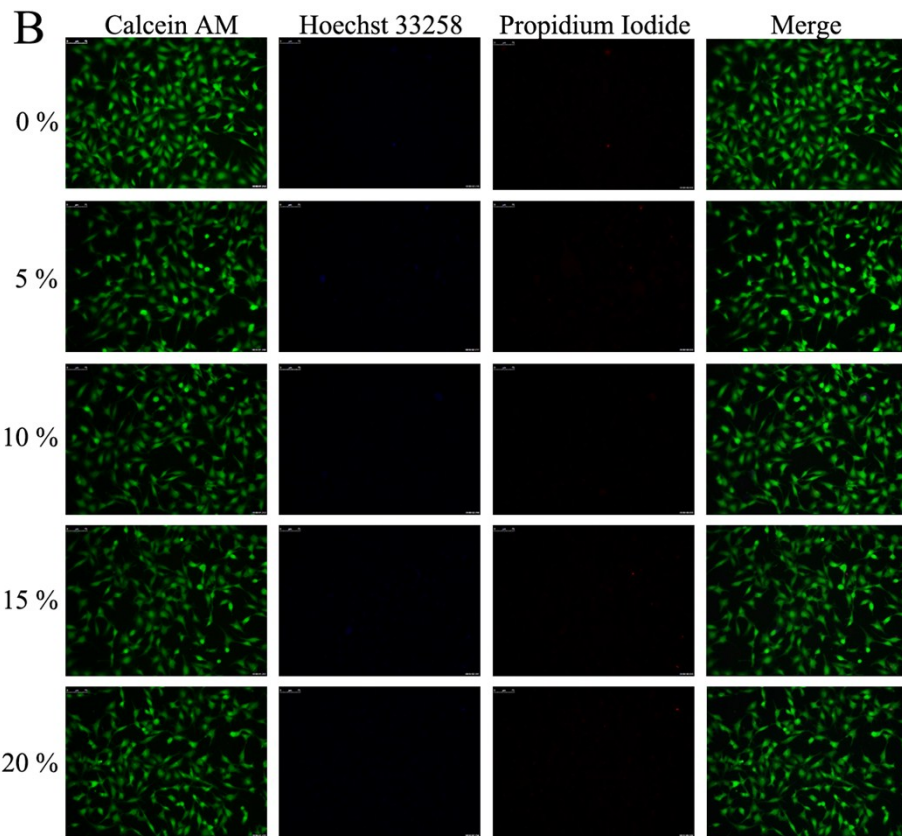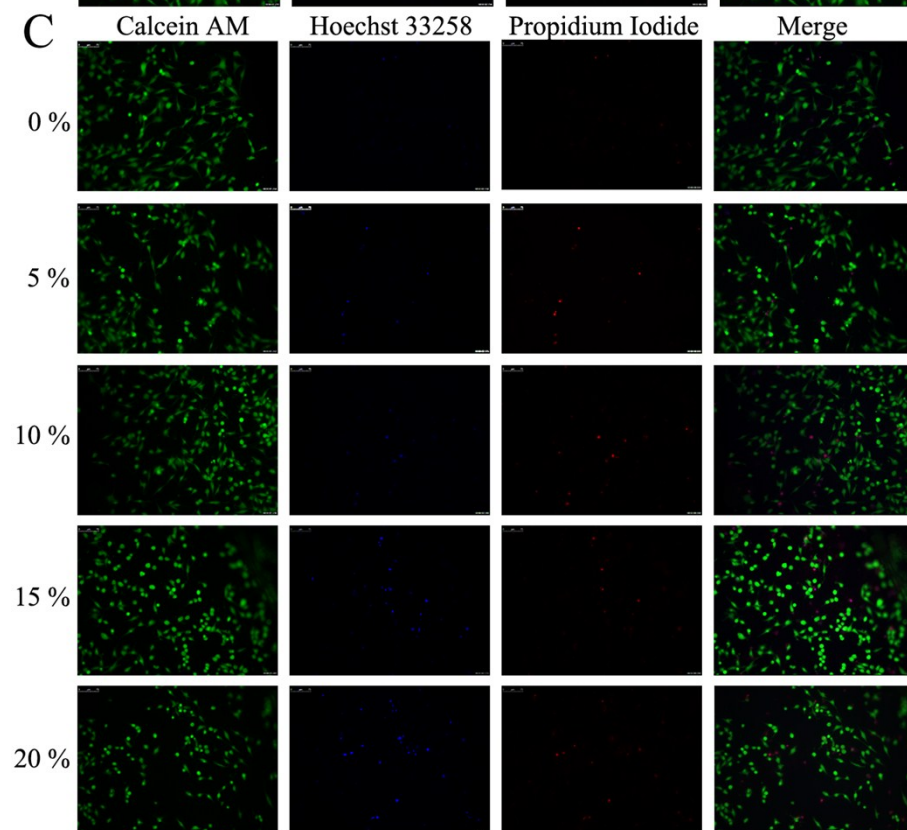

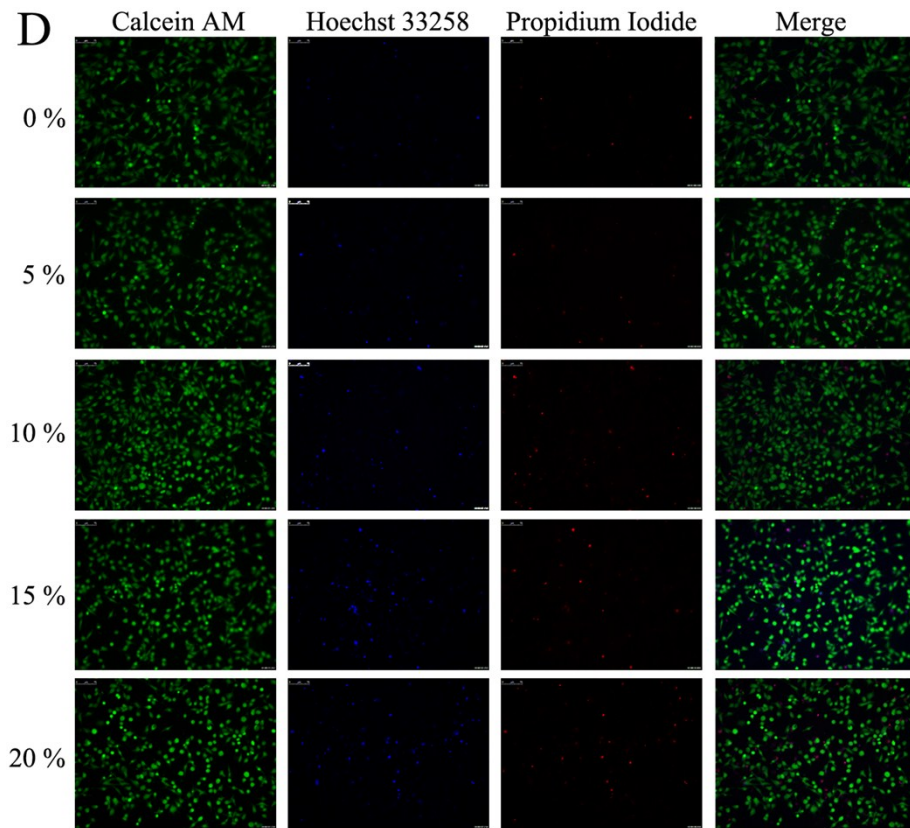

**Figure S-3.** Fluorescent images (20× objective) of the cells in the peripheral regions and intermediate regions in the membranes under the different degrees stretch for 6 h and 12 h. The scale bar is 75  $\mu\text{m}$ . A) The peripheral regions after 6 h stretch; B) the intermediate regions after 6 h stretch; C) the peripheral regions after 12 h stretch; D) the intermediate regions after 12 h stretch.
